# Supplementary material for: A facile approach for preparing biomimetic polymer macroporous structures with petal or lotus effects
Source: Royal Society of Chemistry journal article supplement (doi:10.1039/c3nj01156a), 2014-01-01
Supplement: c3nj01156a.pdf [file c3nj01156a.pdf]

## Supporting Information

### **A facile approach for preparing biomimetic polymer macroporous structures with petal or lotus effects**

*Shan Peng, Wenli Deng\**

*College of Materials Science and Engineering, South China University of Technology,*

*Guangzhou 510640, P. R. China*

Wushan Road, Tianhe District, Guangzhou 510640, P.R. China.

Tel: (+86)020-22236708

E-mail: wldeng@scut.edu.cn

Journal: New Journal of Chemistry

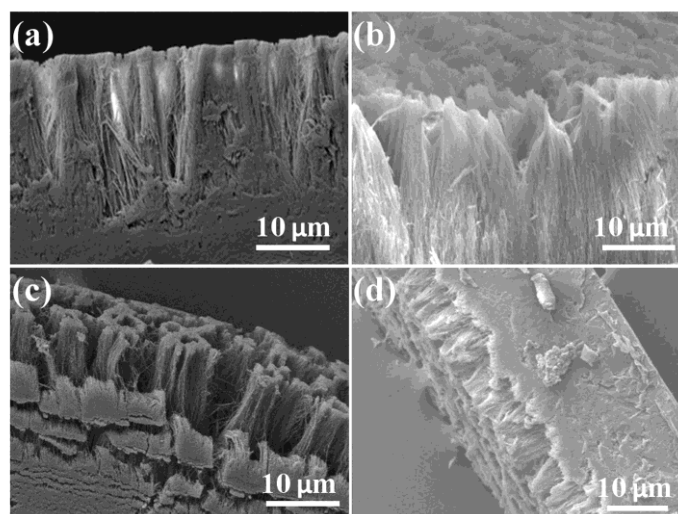

**Fig. S1** (a, b) The cross-sectional SEM images of samples A, B, respectively. (c, d) The cross-sectional SEM images of sample C in different angles.

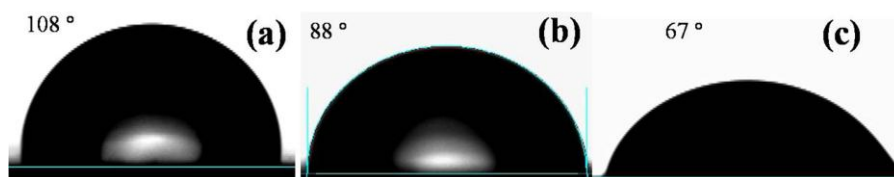

**Fig. S2** The WCAs of the three PMMA macroporous surfaces before modification. (a) Sample A, 108°. (b) Sample B, 88°. (c) Sample C, 67°.

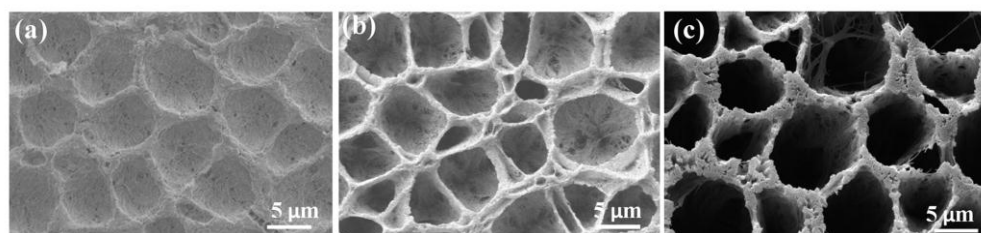

**Fig. S3** (a-c) The enlarged SEM images of samples A-C, respectively.

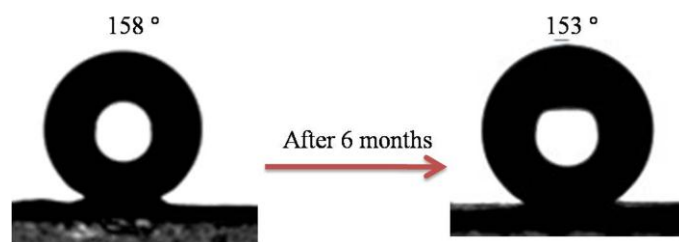

**Fig. S4** The water droplet shapes of the as-prepared superhydrophobic PMMA surface before and after it was placed under the air condition for 6 months. The surface can still keep superhydrophobicity with a WCA of 153° after 6 months.
